# Supplementary material for: A new synthetic route to hollow Co3O4 octahedra for supercapacitor applications
Source: Royal Society of Chemistry journal article supplement (doi:10.1039/c3ce41840e), 2013-11-19
Supplement: c3ce41840e.pdf [file c3ce41840e.pdf]

# A new synthetic route to hollow $\text{Co}_3\text{O}_4$ octahedra for supercapacitor applications

Yuebin Cao,<sup>†,&</sup> Fangli Yuan,<sup>‡,&</sup> Mingshui Yao,<sup>‡</sup> Jin Ho Bang<sup>#,\*</sup> Jung-Ho Lee<sup>†,\*</sup>

<sup>†</sup> Department of Chemical Engineering, Hanyang University, 55 Hanyangdaehak-ro, Sangnok-gu, Ansan, Kyeonggi-do 426-791, Republic of Korea

<sup>‡</sup> State Key Laboratory of Multi-phase Complex Systems, Institute of Process Engineering, Chinese Academy of Sciences (CAS), Beijing 100190, China

<sup>#</sup> Department of Chemistry and Applied Chemistry, Hanyang University, 55 Hanyangdaehak-ro, Sangnok-gu, Ansan, Kyeonggi-do 426-791, Republic of Korea

& These authors contribute equally to the work

\* Corresponding authors

Email: jungho@hanyang.ac.kr (Lee), jbang@hanyang.ac.kr (Bang)

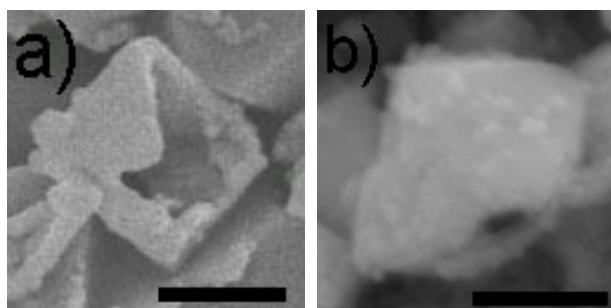

**Figure S1.** SEM images of broken  $\text{Co}_3\text{O}_4$  hollow octahedra. The scale bar in the images is 500 nm.

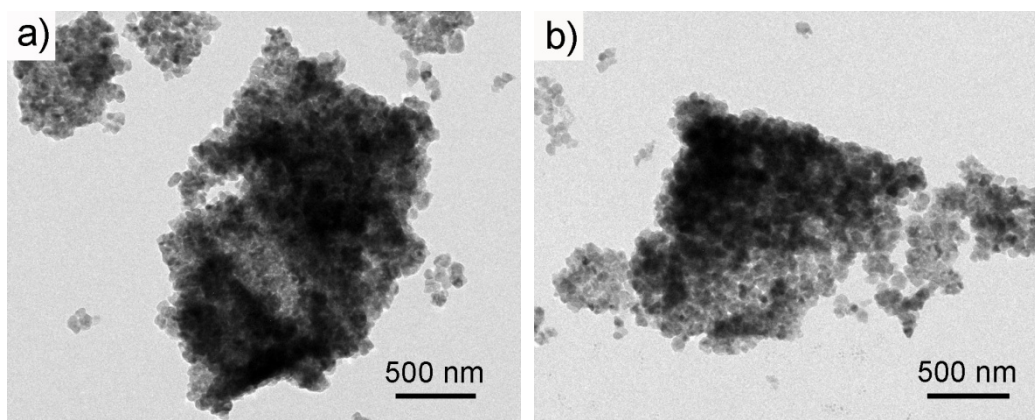

**Figure S2.** TEM images of the quasi-octahedra obtained after 2 h reaction.

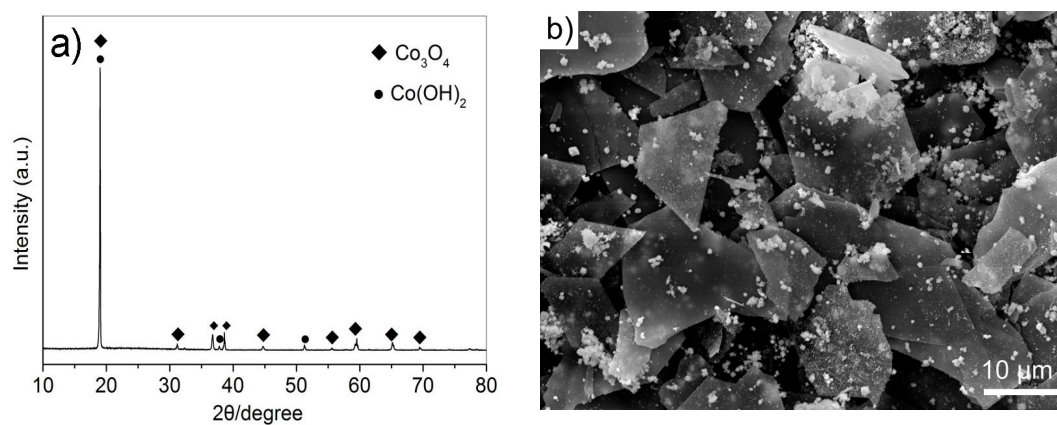

**Figure S3.** (a) XRD pattern and (b) SEM image of the  $\text{Co}_3\text{O}_4$  and  $\beta\text{-Co(OH)}_2$  composite obtained when reaction was performed with 2 M NaOH for 24 h.

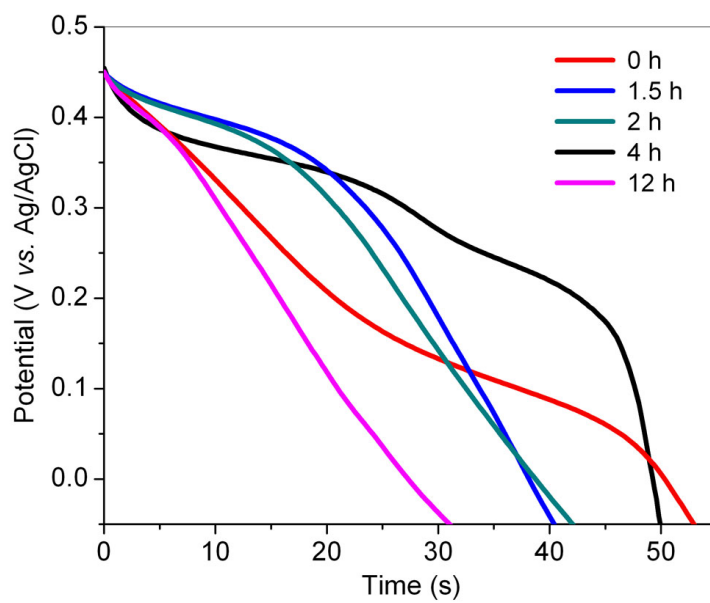

**Figure S4.** Discharging curves of the electrodes fabricated with the samples obtained at various reaction times (0, 1.5, 2, 4, and 12 h, respectively) at a discharging current of  $1 \text{ A g}^{-1}$ .

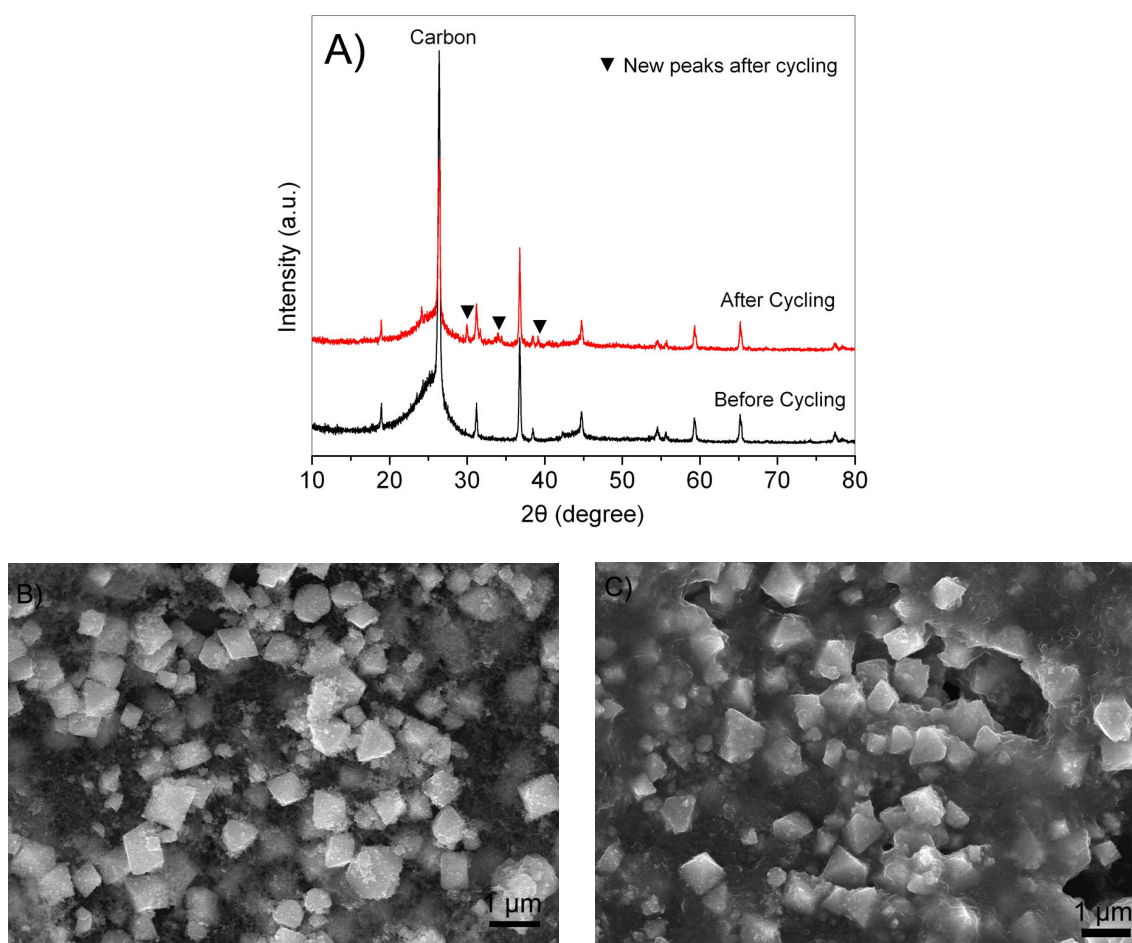

**Figure S5.** (a) XRD patterns and (b, c) SEM images of the Co<sub>3</sub>O<sub>4</sub> hollow octahedra electrode (b) before and (c) after cycling measurement. Cycling measurement was performed at a current density of 2 A g<sup>-1</sup> for 3000 cycles using a chronopotentiometry method.
